# Supplementary material
Source: PubMed Central journal article supplement (PMC6704445)
Supplement: fj.201900179RR.sd1.pdf [file fj.201900179RR.sd1.pdf]

## Supplemental information

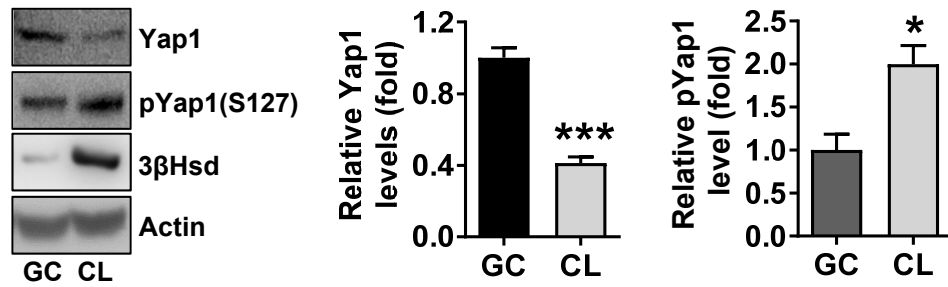

**Supplementary Figure S1. YAP1 is differentially expressed in granulosa cells and luteal cells in the corpus luteum.** Western blot showing the expression of YAP1 and serine(127) phosphorylated YAP1 [YAP1(S127)] in isolated granulosa cells (GC) and corpora lutea (CL) of C57BL/6 mice. Left two bar graphs show the quantitative immunosignal intensity of Yap1 and phosphorylated Yap1 in GC and CL detected by the Western blot. \*:  $P < 0.05$ , compared to GC. \*\*\*:  $P < 0.001$ , compared to GC.

## Supplemental information

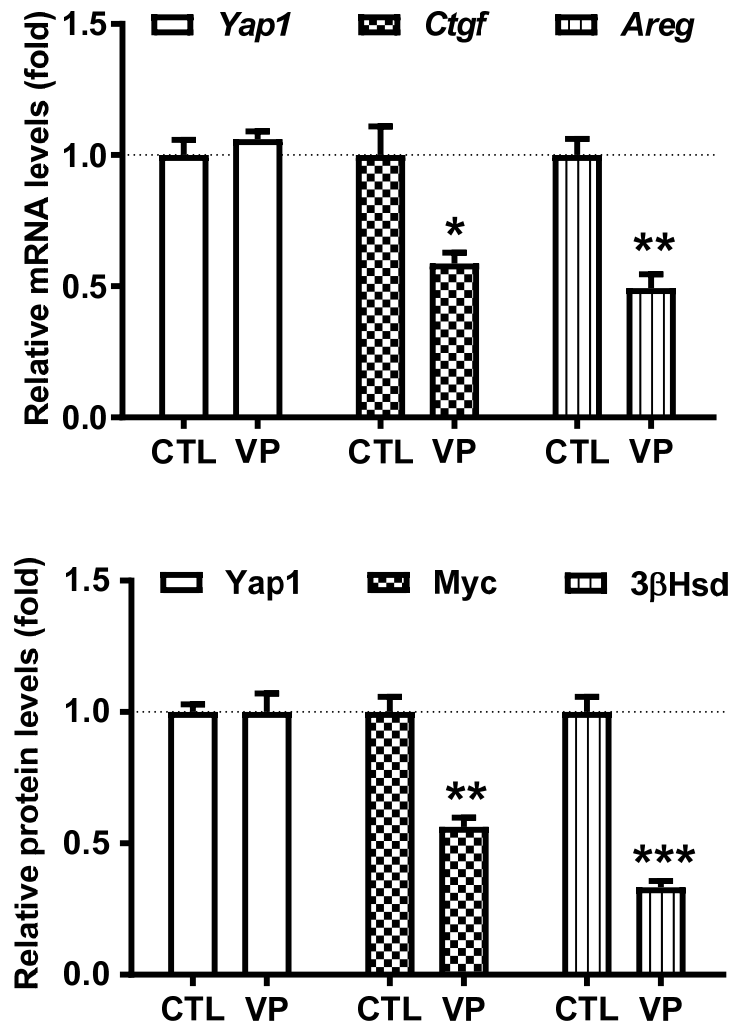

**Supplementary Figure S2. Pharmacological inhibition of YAP1 in granulosa cells with Verteporfin.** Quantitative data of Figure 3E showing relative mRNA (*Yap1*, *Ctgf*, *Areg*) and protein (*Yap1*, *Myc*, *3βHsd*) expression in mouse ovarian tissues treated with vehicle (CTL) or Verteporfin (VP). mRNA and protein were extracted from vehicle-treated control (CTL) or Verteporfin-treated (VP) mouse ovaries. \*:  $P < 0.05$ ; \*\*:  $P < 0.01$ ; \*\*\*:  $P < 0.001$ , compared with CTL.

## Supplemental information

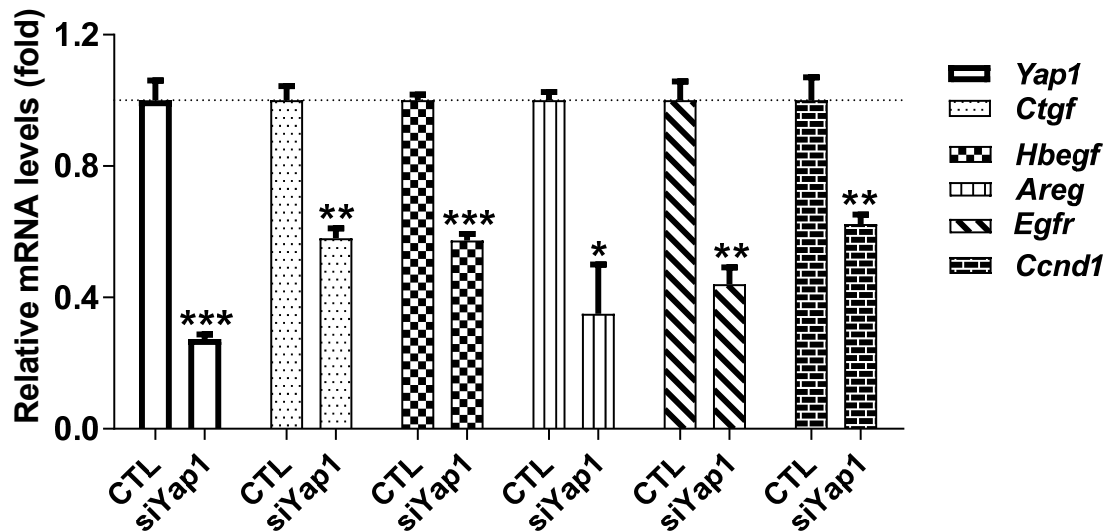

**Supplementary Figure S3. YAP1 regulates HBEGF expression in granulosa cells.** Quantitative data of Figure 6A showing relative mRNA levels of *Yap1*, *Ctgf*, *Hbegf*, *Areg*, *Egfr*, and *Ccnd1* in mouse granulosa cells with or without knockdown of Yap1 using Yap1 siRNA. RNA was extracted from mouse granulosa cells treated with non-targeting control siRNA (CTL) or Yap1 targeting siRNA (siYap1). Gene expression was determined by semi-quantitative PCR. *Gapdh* mRNA was used as an internal control to normalize gene expression data. \*:  $P < 0.05$ ; \*\*:  $P < 0.01$ ; \*\*\*:  $P < 0.001$ .

## Supplemental information

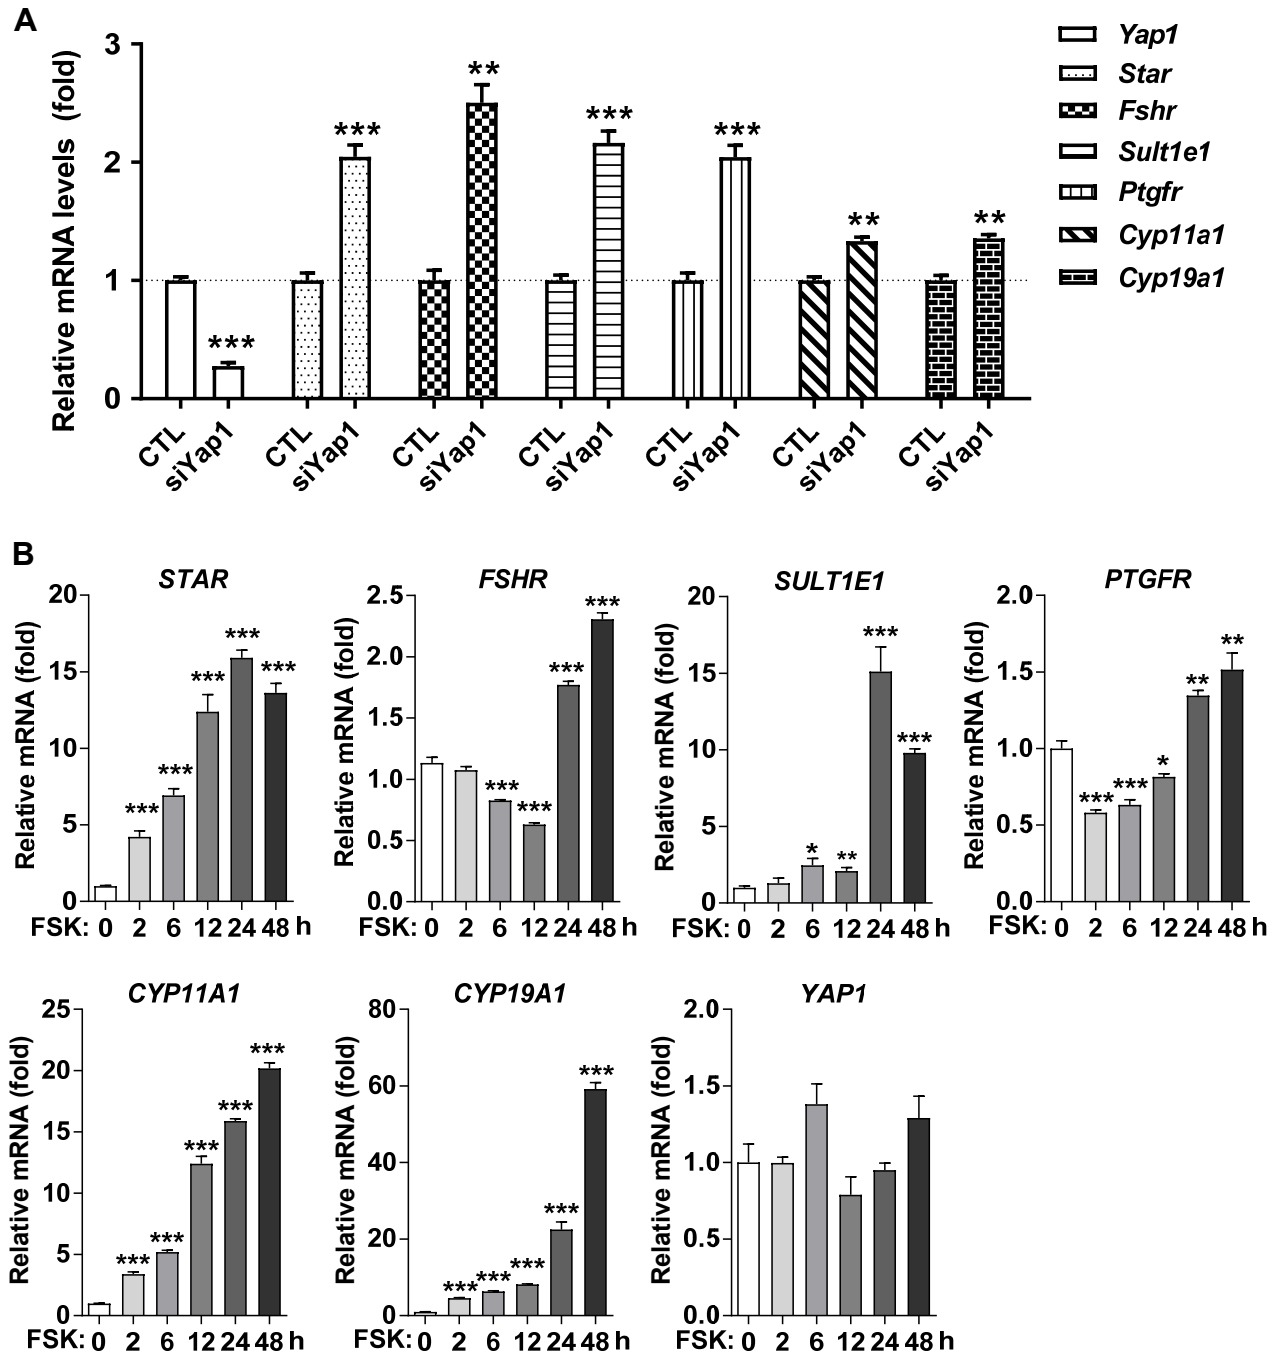

### Supplementary Figure S4. YAP1 suppresses granulosa cell differentiation.

**A)** Quantitative data of Figure 7D showing relative mRNA levels of *Yap1*, *Star*, *Fshr*, *Sult1e1*, *Ptgfr*, *Cyp11a1*, and *Cyp19a1* in mouse granulosa cells with or without knockdown of *Yap1* using *Yap1* siRNA (siYap1). Total RNA was extracted from cultured primary mouse granulosa cells treated with non-targeting control siRNA (CTL) or *Yap1*-targeting siRNA (siYap1). \*\*:  $P < 0.01$ ; \*\*\*:  $P < 0.001$ , compared with CTL. **B)** Quantitative PCR results showing expression of granulosa cell differentiation-associated genes in KGN cells treated with forskolin (FSK, 10 $\mu$ M) for 0-48 hours. \*:  $P < 0.05$ ; \*\*:  $P < 0.01$ ; \*\*\*:  $P < 0.001$ , compared with control (0h).

**Table 1. Primer sequences**

| <b>GENES</b>              | <b>FORWARD PRIMER SEQUENCES</b>                                                       | <b>REVERSE PRIMER SEQUENCES</b>                                                                                          |
|---------------------------|---------------------------------------------------------------------------------------|--------------------------------------------------------------------------------------------------------------------------|
| <b>Mouse</b>              |                                                                                       |                                                                                                                          |
| <i>Yap1</i>               | CAATACGGAATATCAATCCCAG                                                                | GATCGGAACTATTGGTTGTC                                                                                                     |
| <i>Ctgf</i>               | CCCGCCAACCGCAAGATT                                                                    | AGGCGGCTCTGCTTCTCCA                                                                                                      |
| <i>Areg</i>               | AATGAGAACTCCGCTGCTAC                                                                  | CCCCTGTGGAGAGTTCACTG                                                                                                     |
| <i>Gapdh</i>              | CAATGTGTCCGTCGTGGATCT                                                                 | GCCTGCTTACCACCTTCTT                                                                                                      |
| <i>Hbegf</i>              | ATGAAGCTGCTGCCGTCGGT                                                                  | TCAGTGGGAGCTAGCCACGC                                                                                                     |
| <i>Egfr</i>               | GGAGGATGTAGTTGATGCTGATGAG                                                             | GGGCTGATTGTGATAGACAGGGTTC                                                                                                |
| <i>Ccnd1</i>              | CATCAAGTGTGACCCGGACTG                                                                 | CCTCCTCCTCAGTGGCCTTG                                                                                                     |
| <i>Star</i>               | AAAGCCAGCAGGAGAACGGGGA                                                                | GCCTCCATGCGGTCCACAAGTT                                                                                                   |
| <i>Fshr</i>               | GGGCTGGAGTCCATTGACAGC                                                                 | CAGTTTATAACGACTGGTCAG                                                                                                    |
| <i>Sult1e1</i>            | GCCAAAGATGTGCGCCGTTTC                                                                 | AACCATACGGAACCTTGCCCT                                                                                                    |
| <i>Ptgr</i>               | CTGGCCATAATGTGCGTCTC                                                                  | TGTCGTTTACAGGTCCTGG                                                                                                      |
| <i>Cyp11a1</i>            | GGGGCAACAAGCTGCCCTTCAA                                                                | TGCAGGGTCATGGAGGTCGTGT                                                                                                   |
| <i>Cyp19a1</i>            | TCGGCATGCATGAGAACGGCA                                                                 | CAGGGCCCGTCAGAGCTTTTCA                                                                                                   |
| <i>Tgfβ1</i>              | TACGTCAGACATTCCGGGAAGCA                                                               | AGGTAACGCCAGGAATTGTTGC                                                                                                   |
| <i>Tgfβ2</i>              | GCCTTCGCCCTCTTTACATTGA                                                                | CGGAAGCTTCGGGATTTATGGT                                                                                                   |
| <i>Smad6</i>              | CCACTGGATCTGTCCGATTC                                                                  | AAGTCGAACACCTTGATGGAG                                                                                                    |
| <i>Smad7</i>              | TCCTGCTGTGCAAAGTGTTT                                                                  | AGTAAGGAGGAGGGGGAGAC                                                                                                     |
| <i>Smad1</i>              | ACCCCTACCACTATAAGCGAG                                                                 | TGCTGGAAAGAGTCTGGGAAC                                                                                                    |
| <i>Smad2</i>              | ATGTCGTCCATCTTGCCATTC                                                                 | AACCGTCCTGTTTTCTTTAGCTT                                                                                                  |
| <i>Smad3</i>              | CACAGCCACCATGAATTACGG                                                                 | TGGCGTCTACTCTCTGATAGT                                                                                                    |
| <b>Human</b>              |                                                                                       |                                                                                                                          |
| <i>YAP1</i>               | GCAACTCCAACCAGCAGCAACA                                                                | CGCAGCCTCTCCTTCTCCATCTG                                                                                                  |
| <i>HBEGF</i>              | GCTCCCTCCTGCATCTGCCA                                                                  | GAGGCTCAGCCCATGACACCTCT                                                                                                  |
| <i>STAR</i>               | CGTGACTTTGTGAGCG                                                                      | GCCACGTAAGTTTGGT                                                                                                         |
| <i>FSHR</i>               | TTCAAGAACAAGGATCCATTCC                                                                | CCTGGCCCTCAGCTTCTTAA                                                                                                     |
| <i>SULT1E1</i>            | AAGGGAATTACAGGAGACTG                                                                  | TAGATTCCTTCATTTGCTGC                                                                                                     |
| <i>PTGFR</i>              | CCCATTTCTGGTTACAATGG                                                                  | TAGAGATTCTTAAGGACAGCC                                                                                                    |
| <i>CYP11A1</i>            | TGGGTGCGCTATCACCAGTAT                                                                 | CCACCCGGTCTTTCTTCCA                                                                                                      |
| <i>CYP19A1</i>            | TGAATATTGGAAGGATGCACAGAC                                                              | TGGAATCGTCTCAGAAGTGTAAACGAG                                                                                              |
| <i>GAPDH</i>              | CAGCCTCAAGATCATCAGCA                                                                  | GTCTTCTGGGTGGCAGTGAT                                                                                                     |
| <b>Mouse genotyping</b>   |                                                                                       |                                                                                                                          |
| <i>Foxl2-Cre/Ert2</i>     | Common:<br>AGAGAAGAGAGTGAGAGCCG                                                       | Wild Type (335 bp):<br>GAGCGCCACGTACGAGTACG<br>Mutant (221 bp) :<br>GTCCAGCTCGACCAGGATGG                                 |
| <i>Cyp19-Cre</i>          | Wild Type (109 bp):<br>AAATGAGGACAGGCACCTTG<br>Mutant (140 bp):<br>GAAACAGGGGCAATGGTG | Common:<br>CGGATAAGTAATGCCCCAGA                                                                                          |
| <i>Yap1<sup>lox</sup></i> | Common:<br>ACATGTAGGTCTGCATGCCAGAGGAGG                                                | Wild Type (457 bp) & Loxp (600 bp) :<br>AGGCTGAGACAGGAGGATCTCTGTGAG<br>Knockout (338 Bp) :<br>TGGTTGAGACAGCGTGCCTATGGAGC |
